# Supplementary material for: Immune profiling after allogeneic hematopoietic cell transplantation in pediatric acute myeloid leukemia
Source: PubMed Central journal article supplement — Blood Adv. 2023 Jun 20;7(17):5069–81. doi: 10.1182/bloodadvances.2022009468 (PMC10471937; doi:10.1182/bloodadvances.2022009468), 2023-06-20

## SUPPLEMENTAL INFORMATION

**Supplemental Table 1: Marker genes used to classify individual cells to major cell types.**

| <b>Major Cell Type</b> | <b>Markers</b>                                                                       |
|------------------------|--------------------------------------------------------------------------------------|
| T cell                 | CD3E, CD3G, CD3D                                                                     |
| NK cell                | NCAM1                                                                                |
| AML blast              | ELANE, PRAME, CSF3R, ARMH1, ITM2C, EGFL7, C1QTNF4, MGST1, MPO, PRSS57, AZU1, CLEC11A |
| Normal myeloid cell    | LYZ, AIF1, TYROBP                                                                    |
| B/Plasma cell          | MS4A1, CD79A, CD79B, IGHM, BANK1, CD37                                               |

**Supplemental Table 2: Clinical information for patients 1-4.**

| Patient ID | Age at Initial Diagnosis (In Years) | Gender | Vital Status | Cytogenetics & Molecular Genetics Results at Diagnosis            | Active Issues at Time of Diagnosis | Type of HCT Received                                                        | Conditioning Regimen                         | Time from Transplant to Relapse (In Months) | Chimerism at Time of Relapse (Donor %)                                                      | Immuno-suppression at Time of Relapse | Cytogenetics & Molecular Genetics Results at Relapse                                                               | Active Issues at Time of Relapse                                                    | Second HCT Information                                                                               | Host CMV IgG Status | Donor CMV IgG Status                                 |
|------------|-------------------------------------|--------|--------------|-------------------------------------------------------------------|------------------------------------|-----------------------------------------------------------------------------|----------------------------------------------|---------------------------------------------|---------------------------------------------------------------------------------------------|---------------------------------------|--------------------------------------------------------------------------------------------------------------------|-------------------------------------------------------------------------------------|------------------------------------------------------------------------------------------------------|---------------------|------------------------------------------------------|
| UPN1       | 17.2                                | Female | Alive        | FLT3 ITD, NRAS (NM_002524) exon2 p.G12A (c.35G>C)                 | Axillary abscess (on clindamycin)  | Unmodified 10/10 HLA-identical sister in CR1                                | Clofarabine, fludarabine, busulfan           | 7                                           | BM: 29% bulk BM<br>PBL: 87% total circ lymphs, 98% myeloid/neutrophil, 89% T, 98% B, 95% NK | Tacrolimus                            | CEBPA (NM_004364) exon1 p.K304Sfs*14 (c.911delA), TP53 (NM_000546) exon5 p.R181H (c.542G>A)                        | No active issues; no hx GVHD                                                        | Unmodified 4/6 HLA-matched UCBT, conditioning w/ cyclophosphamide, fludarabine, thiotepa, TBI in CR2 | Negative            | Negative                                             |
| UPN2       | 14.5                                | Female | Alive        | FLT3 ITD                                                          | Parainfluenza, CMV IgM positive    | Unmodified 10/10 HLA-identical brother BMT in CR1                           | Busulfan, melphalan                          | 30                                          | BM: 35% bulk BM                                                                             | None                                  | TET2 (NM_001127208) exon4 p.E1144K (c.3430G>A)                                                                     | Coronavirus; hx duodenal GVHD (resolved; off tx)                                    | Unmodified 4/6 HLA-matched double UCBT, conditioning w/ clofarabine, melphalan, thiotepa in CR2      | Positive            | Positive                                             |
| UPN3       | 6.0                                 | Male   | Dead         | RUNX1-RUNX1T1 (AML1-ETO), IDH1 exon 4 p.R132C, KIT exon17 p.N822K | No active issues/infections        | Unmodified 5/6 HLA-matched single female UCBT in CR2                        | Clofarabine, melphalan, thiotepa             | 7                                           | PBL: 85% total circ lymphs, 98% myeloid/neutrophil, 100% T, 100% B, 26% NK                  | MMF, CSA, prednisolone                | RUNX1-RUNX1T1 (AML1-ETO), ASXL1 exon12 p.W898*, CEBPA exon1 p.H195_P196dup, IDH1 exon4 p.R132C, KIT exon17 p.N822K | GI GVHD flare 4 months prior, actively tapering steroids; stool adeno +; BK virus + | N/A                                                                                                  | Negative            | Positive                                             |
| UPN4       | 20.3                                | Female | Dead         | MLL rearranged, FLT3-ITD, 5q-                                     | No active issues/infections        | Double 4/6 UCBT + CliniMACS CD34+PBS CT from haplo mismatched father in CR1 | Fludarabine, thiotepa, cyclophosphamide, TBI | 7                                           | BM: 88% bulk BM                                                                             | Prednisone                            | FLT3-ITD negative, MLL rearranged                                                                                  | Active C. diff infection; leukemia cutis; breast chloromas; no hx GVHD              | N/A                                                                                                  | Positive            | CBU1: Positive, CBU2: Negative Haplo Donor: Positive |

BM: bone marrow, BMT: bone marrow transplant, CBU: cord blood unit, CMV: cytomegalovirus, CR1: complete remission 1, CR2: complete remission 2, CSA: cyclosporine, GI: gastrointestinal, GVHD: graft-versus-host disease, hx: history, MMF: mycophenolate mofetil, PBL: peripheral blood leukocytes (bulk), PBSCT: peripheral blood stem cell transplant, TBI: total body irradiation, tx: treatment, UCBT: umbilical cord blood transplant

**Supplemental Table 3: Change in each AML blast subtype per patient from diagnosis to post-transplant relapse evaluated by Fisher's exact test.**

|           | <b>Patient</b> | <b>Blast Subtype</b> | <b>Cells Diagnosis</b> | <b>Cells Relapse</b> | <b>Blasts Diagnosis</b> | <b>Blasts Relapse</b> | <b>P-Value</b>           |
|-----------|----------------|----------------------|------------------------|----------------------|-------------------------|-----------------------|--------------------------|
| <b>0</b>  | UPN4           | GMP-like             | 4224                   | 655                  | 1008                    | 105                   | 5.019126835011<br>01E-06 |
| <b>1</b>  | UPN4           | ProMono-like         | 4224                   | 655                  | 1044                    | 327                   | 3.368855621273<br>75E-37 |
| <b>2</b>  | UPN4           | cDC-like             | 4224                   | 655                  | 759                     | 15                    | 2.136217147168<br>78E-33 |
| <b>3</b>  | UPN4           | Prog-like            | 4224                   | 655                  | 536                     | 179                   | 6.263274086787<br>16E-20 |
| <b>4</b>  | UPN4           | Mono-like            | 4224                   | 655                  | 809                     | 19                    | 4.101458784189<br>32E-33 |
| <b>5</b>  | UPN4           | HSC-like             | 4224                   | 655                  | 68                      | 10                    | 1                        |
| <b>6</b>  | UPN2           | GMP-like             | 834                    | 1279                 | 79                      | 105                   | 0.343585285              |
| <b>7</b>  | UPN2           | ProMono-like         | 834                    | 1279                 | 200                     | 102                   | 3.542869743189<br>53E-24 |
| <b>8</b>  | UPN2           | cDC-like             | 834                    | 1279                 | 15                      | 87                    | 3.460061357202<br>16E-08 |
| <b>9</b>  | UPN2           | Prog-like            | 834                    | 1279                 | 432                     | 314                   | 3.195665657475<br>33E-37 |
| <b>10</b> | UPN2           | Mono-like            | 834                    | 1279                 | 77                      | 524                   | 3.585988359552<br>42E-62 |
| <b>11</b> | UPN2           | HSC-like             | 834                    | 1279                 | 31                      | 147                   | 6.767077807483<br>83E-11 |
| <b>12</b> | UPN3           | GMP-like             | 3                      | 218                  | 0                       | 69                    | 0.553797693              |
| <b>13</b> | UPN3           | ProMono-like         | 3                      | 218                  | 0                       | 33                    | 1                        |
| <b>14</b> | UPN3           | cDC-like             | 3                      | 218                  | 0                       | 3                     | 1                        |
| <b>15</b> | UPN3           | Prog-like            | 3                      | 218                  | 2                       | 76                    | 0.284850927              |
| <b>16</b> | UPN3           | Mono-like            | 3                      | 218                  | 1                       | 33                    | 0.395679663              |
| <b>17</b> | UPN3           | HSC-like             | 3                      | 218                  | 0                       | 4                     | 1                        |
| <b>18</b> | UPN1           | GMP-like             | 2244                   | 274                  | 399                     | 57                    | 0.213806602              |
| <b>19</b> | UPN1           | ProMono-like         | 2244                   | 274                  | 603                     | 68                    | 0.514871973              |
| <b>20</b> | UPN1           | cDC-like             | 2244                   | 274                  | 46                      | 4                     | 0.649592806              |

|           |      |           |      |     |      |     |                          |
|-----------|------|-----------|------|-----|------|-----|--------------------------|
| <b>21</b> | UPN1 | Prog-like | 2244 | 274 | 1128 | 120 | 0.047179394              |
| <b>22</b> | UPN1 | Mono-like | 2244 | 274 | 43   | 10  | 0.071554087              |
| <b>23</b> | UPN1 | HSC-like  | 2244 | 274 | 25   | 15  | 7.888840239899<br>91E-06 |

**Supplemental Table 4: Gene markers used to define T and NK cell subtypes.**

| Cell Type             | Gene Markers                                                                                                                                                                                 |
|-----------------------|----------------------------------------------------------------------------------------------------------------------------------------------------------------------------------------------|
| NK Activated          | NKG7, TNFSF10, FASLG, TNF, IFNG, GZMB, PRF1                                                                                                                                                  |
| NK Exhausted          | PDCD1, HAVCR2, TIGIT                                                                                                                                                                         |
| Naive T               | CCR7, LEF1, SELL, TCF7                                                                                                                                                                       |
| Activated CD8 (ISG)   | CD8B, LAMP3, CMPK2, IFIT3, MX1, RSAD2, IFI44L, IFIT1                                                                                                                                         |
| CD8 Memory            | CRTAM, CD8B, CD8A                                                                                                                                                                            |
| CD8 Exhausted (MHCII) | PDCD1, DTHD1, HLA-DRB1, IFNG, HLA-DMA, ARHGAP18, GZMK, TIGIT, HLA-DQA1, TOX, HLA-DRA, HLA-DQB1, CCL3, F2R                                                                                    |
| Activated CD8 (MHCII) | EFHD2, ARAP2, HLA-DRB5, ZBP1, SYTL2, MCOLN2, ENC1, DNAJC1, VAV3, OASL, KLRD1, PTMS, HOPX, GBP5, TBX21, TGFBR3, FOSL2, LAG3, ACTN4, HLA-DPA1, HLA-DPB1, MYO1F, STOM, PTPRE, PRF1, CYTOR, GZMA |
| T Regulatory          | FOXP3, CTLA4, IL2RA, FANK1                                                                                                                                                                   |
| T Helper              | KLRB1, CTSH, IL26, IL23R, RORC, CD200, PTPN13, BTLA, CXCL13, BCL6, CXCR5                                                                                                                     |

**Supplemental Table 5: Amino acid sequences of TCB clonotypes present in UPN 4.**

| Amino Acid Sequence | Clone Number |
|---------------------|--------------|
| CASSKTADTEAFF       | Clonotype 1  |
| CASSFGAGGSNQPQHF    | Clonotype 2  |
| CASLTGGGLYEQYF      | Clonotype 3  |
| CASSGVLADYEQYF      | Clonotype 4  |
| CASSTRYGPPYEQYF     | Clonotype 5  |
| CASSVARLTGGNWGQPQHF | Clonotype 6  |
| CASSLAGYSNQPQHF     | Clonotype 7  |
| CASSLHTDSYG YTF     | Clonotype 8  |
| CASSLASGAYGYTF      | Clonotype 9  |
| CASSQDSGGPDTQYF     | Clonotype 10 |
| CAISGTRYNEQFF       | Clonotype 11 |
| CAISESGTGRSYEQYF    | Clonotype 12 |
| CASSPGTSGGVDNEQFF   | Clonotype 13 |
| CSARDRGRTEAFF       | Clonotype 14 |
| CASSLGTNSPLHF       | Clonotype 15 |
| CASRDRGRLYGYTF      | Clonotype 16 |
| CASSSGHYEQYF        | Clonotype 17 |

**Supplemental Figure 1: Experimental schema.**

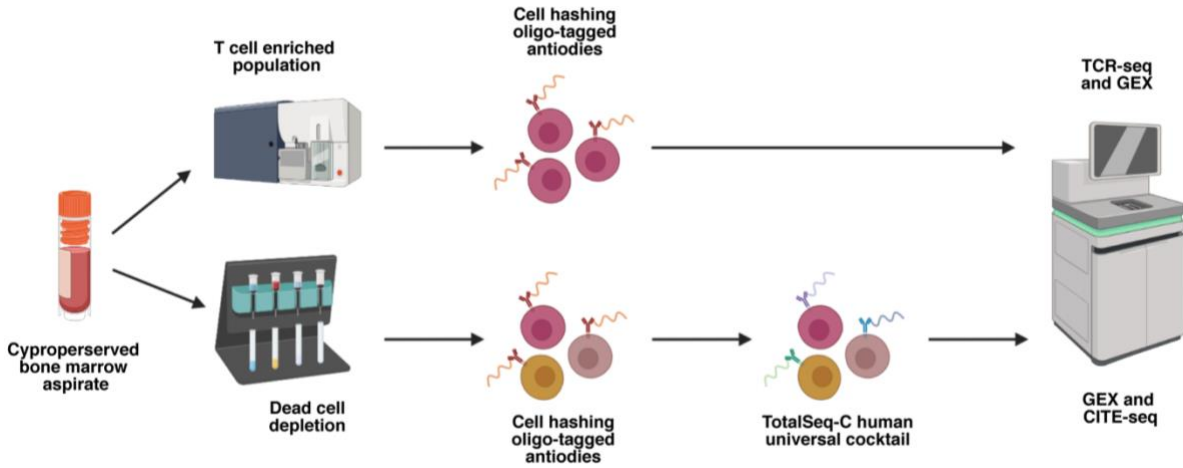

**Supplemental Figure 2: Sequencing modalities obtained for individual patient samples.**

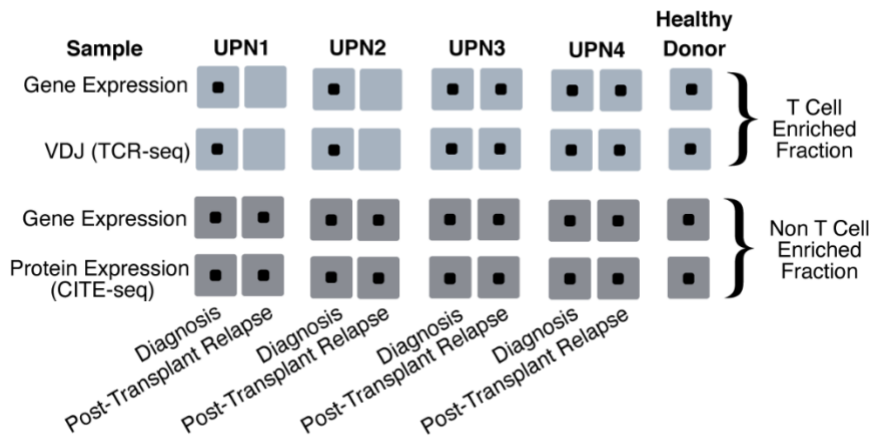

**Supplemental Figure 3: Heatmap showing manual validation of 5 transcriptionally distinct cell clusters/broad hematopoietic cell types using canonical gene (A) and surface (B) markers obtained by CITEseq analysis.**

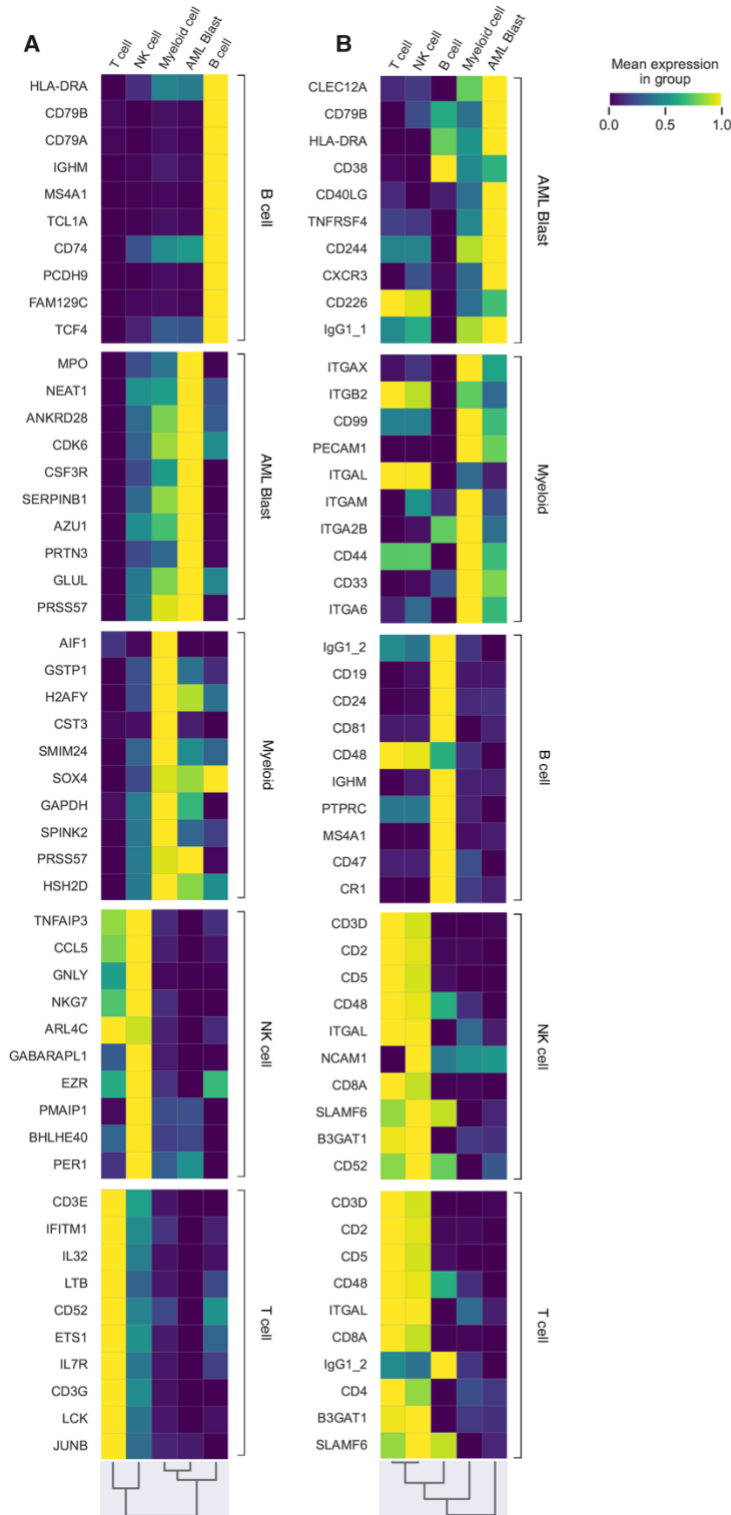

**Supplemental Figure 4: Probabilistic cell type assignment reclassified per patient (A) and timepoint (B) showing that each myeloid cluster 1-4 (C) contains known myeloid/AML markers (D-E) and appear to be patient-specific.**

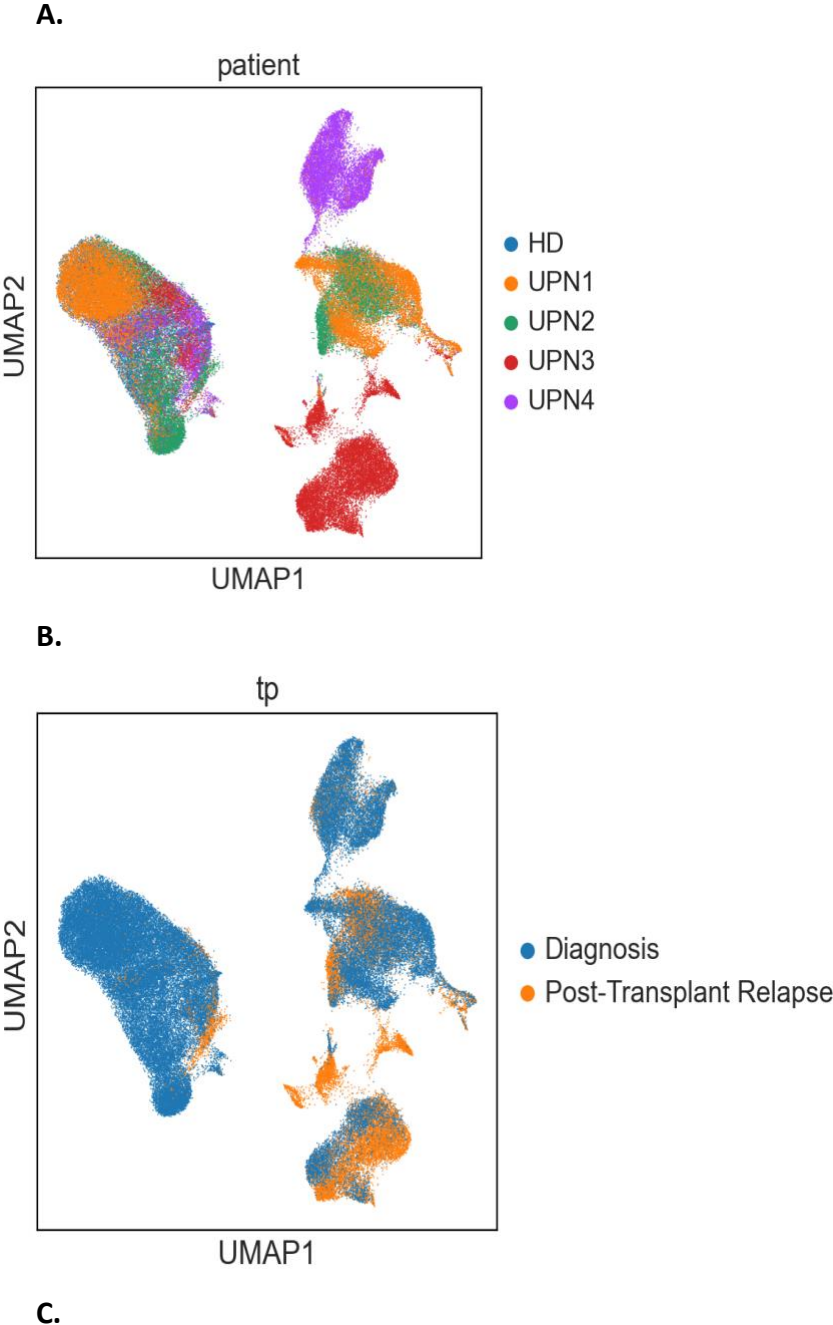

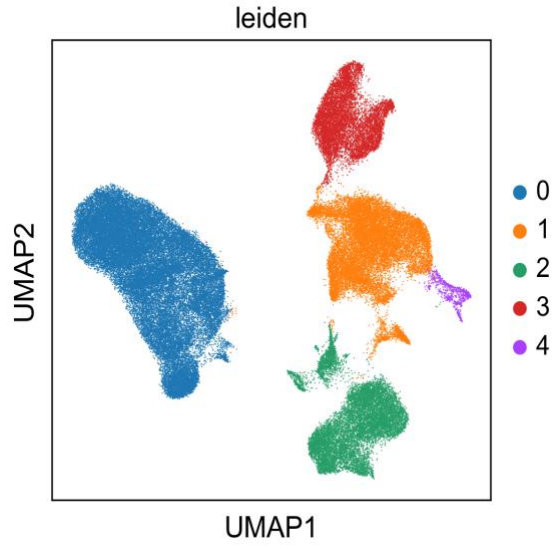

D.

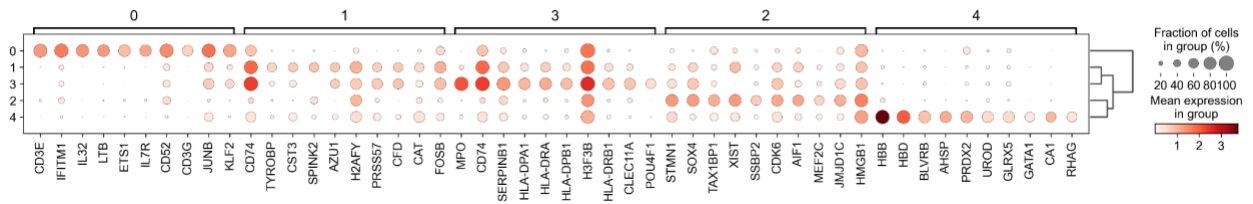

E.

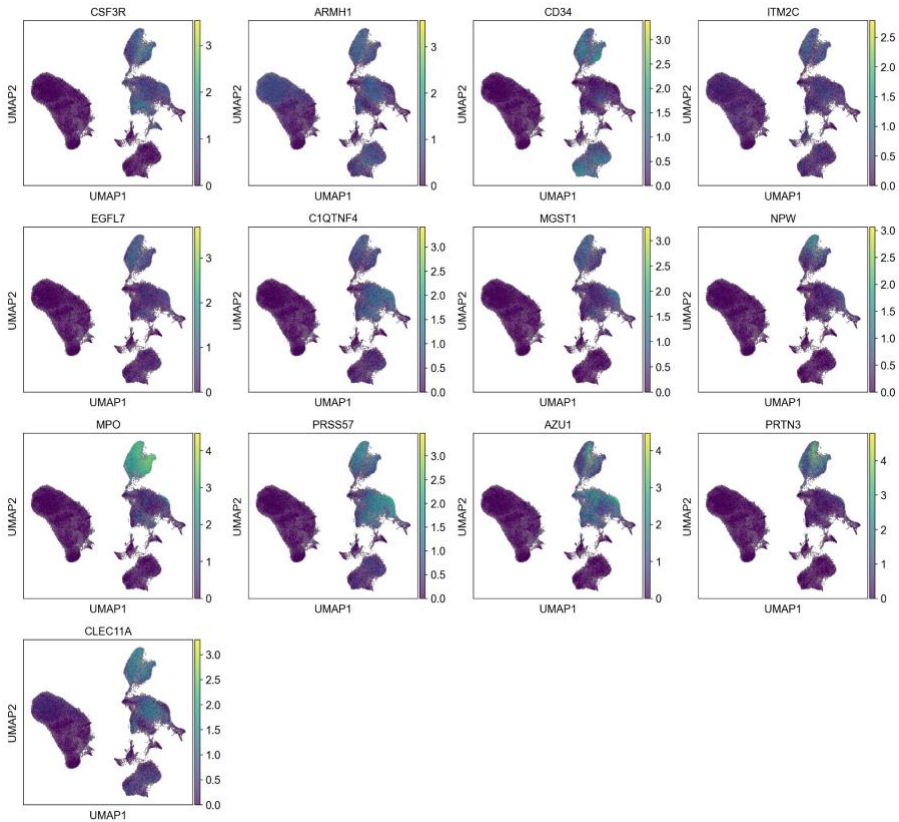



**Supplemental Figure 5: Heatmap showing MHC class I and II gene expression changes in AML blasts per patient between diagnosis and post-transplant relapse using CITEseq.**

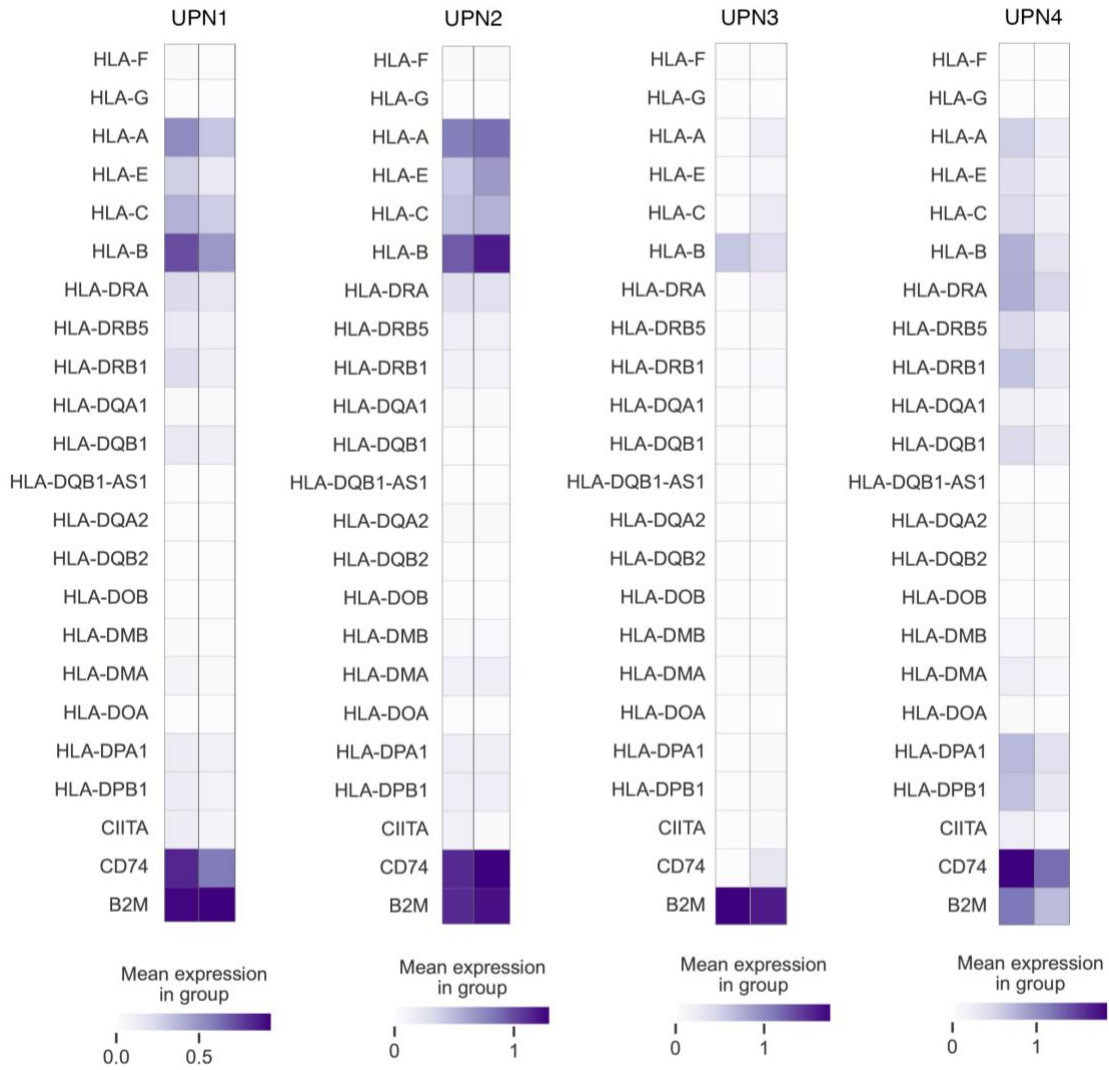

**Supplemental Figure 6: Heatmap showing MHC class I and II protein expression changes using CITE-seq between pediatric AML diagnosis and post-transplant relapse for UPN1-4.**

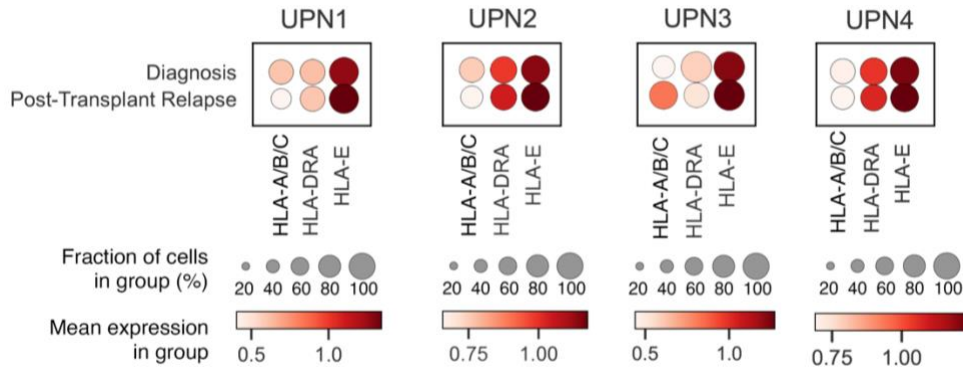

**Supplemental Figure 7: Clinical flow cytometric data of HLA-DR expression for UPN1 at diagnosis (A) and post-transplant relapse (B).**

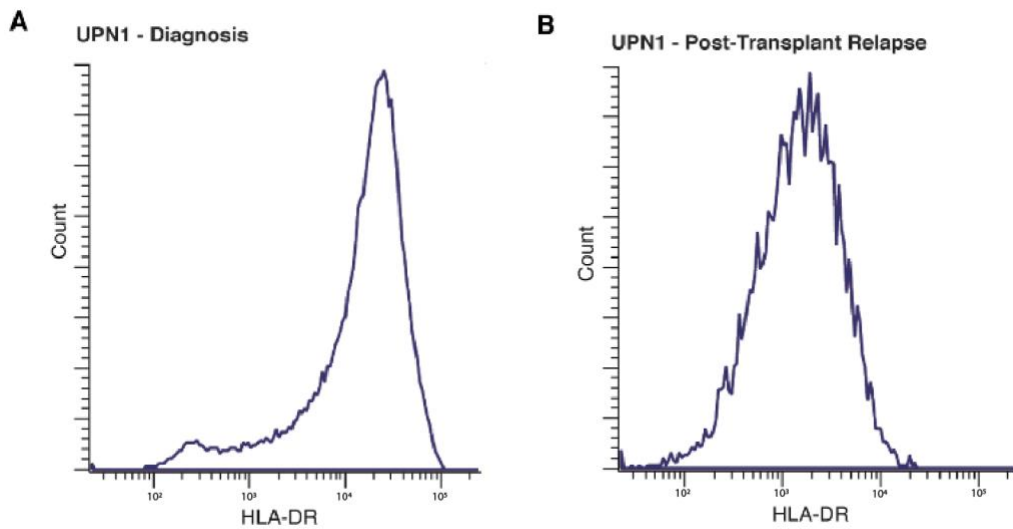

**Supplemental Figure 8: Heatmap showing NKG2D ligand gene expression changes between pediatric AML diagnosis and post-transplant relapse aggregated for UPN1-4. \* indicates P-value <0.05.**

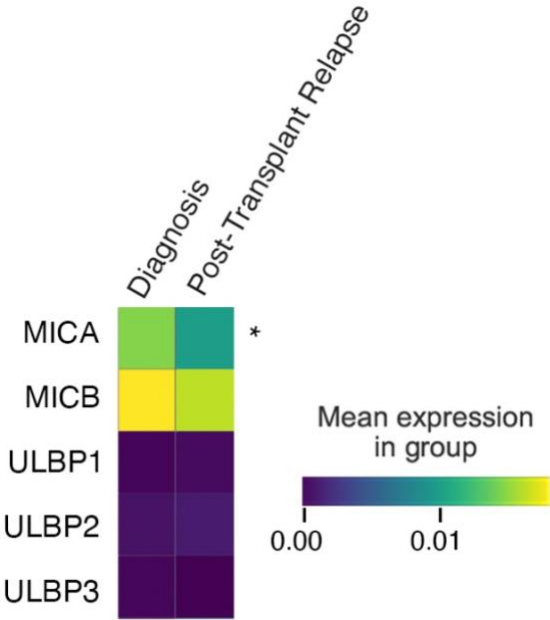

**Supplemental Figure 9: Number of AML blasts in bone marrow aspirate samples per patient.**

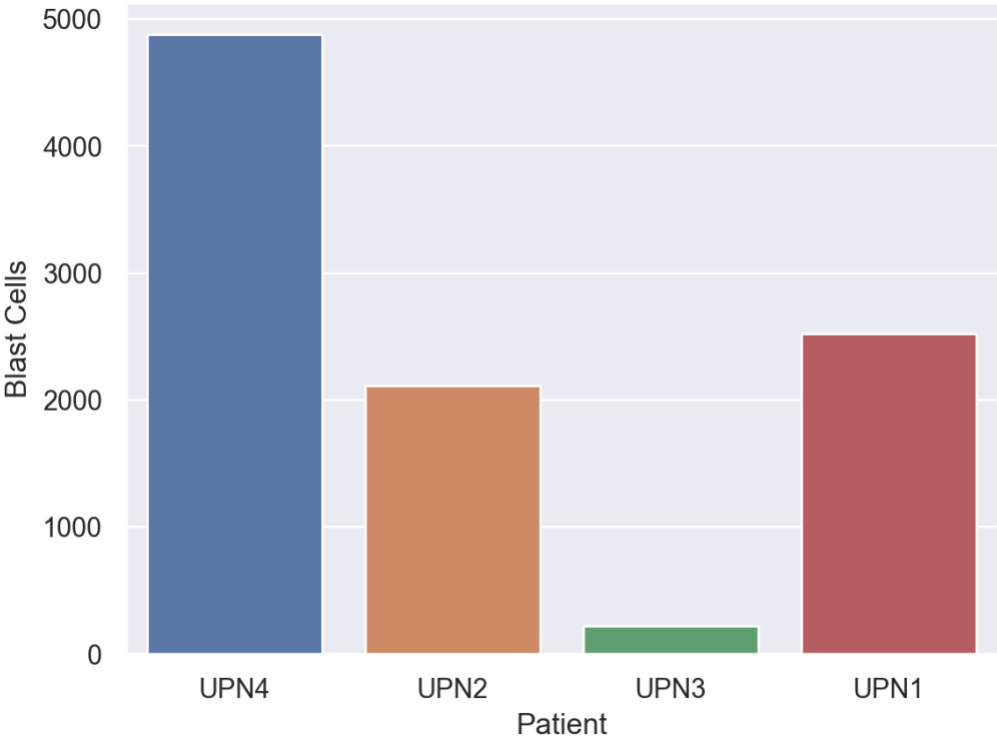

**Supplemental Figure 10: ELANE, MPO, and AZU1 gene expression in AML blasts as compared to healthy myeloid cells. \*\*\* indicates P-value <0.001.**

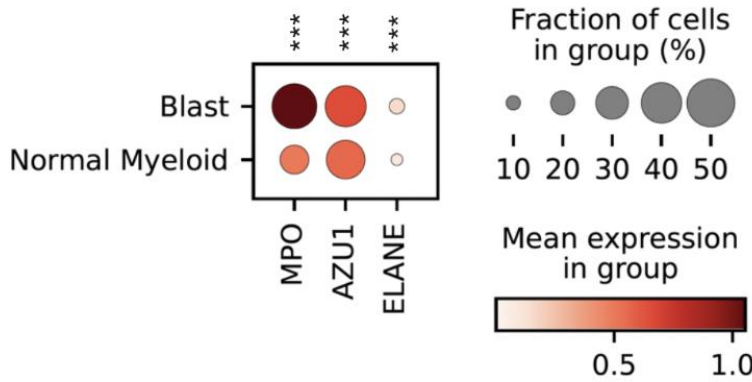

**Supplemental Figure 11: Heatmap showing gene expression level for MHC-II, upstream MHC-II activators, and upstream MHC-II repressors for each category of AML blast subtype (HSC-like, progenitor-like, GMP-like, promonocyte-like, monocyte-like, and cDC-like).**

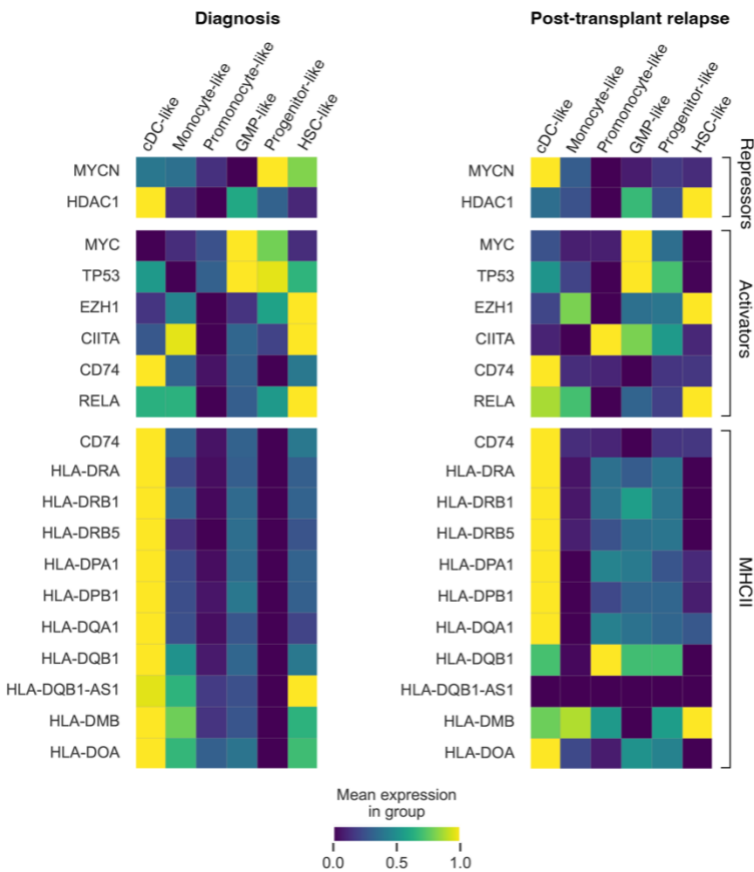

**Supplemental Figure 12: Single-cell bone marrow immune microenvironment of healthy donor.**

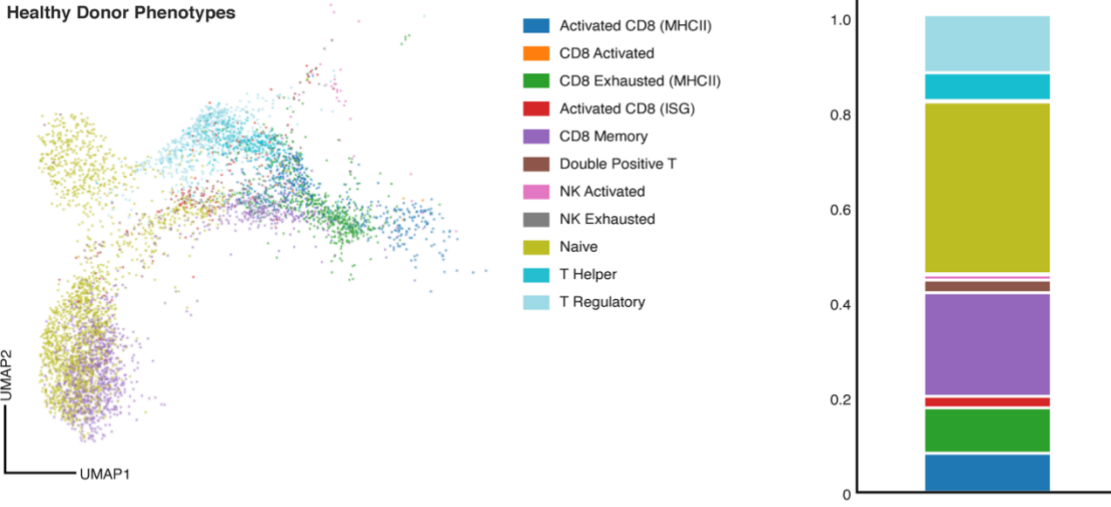

### Supplemental Figure 13: Single-cell bone marrow immune microenvironment of UPN1-4.

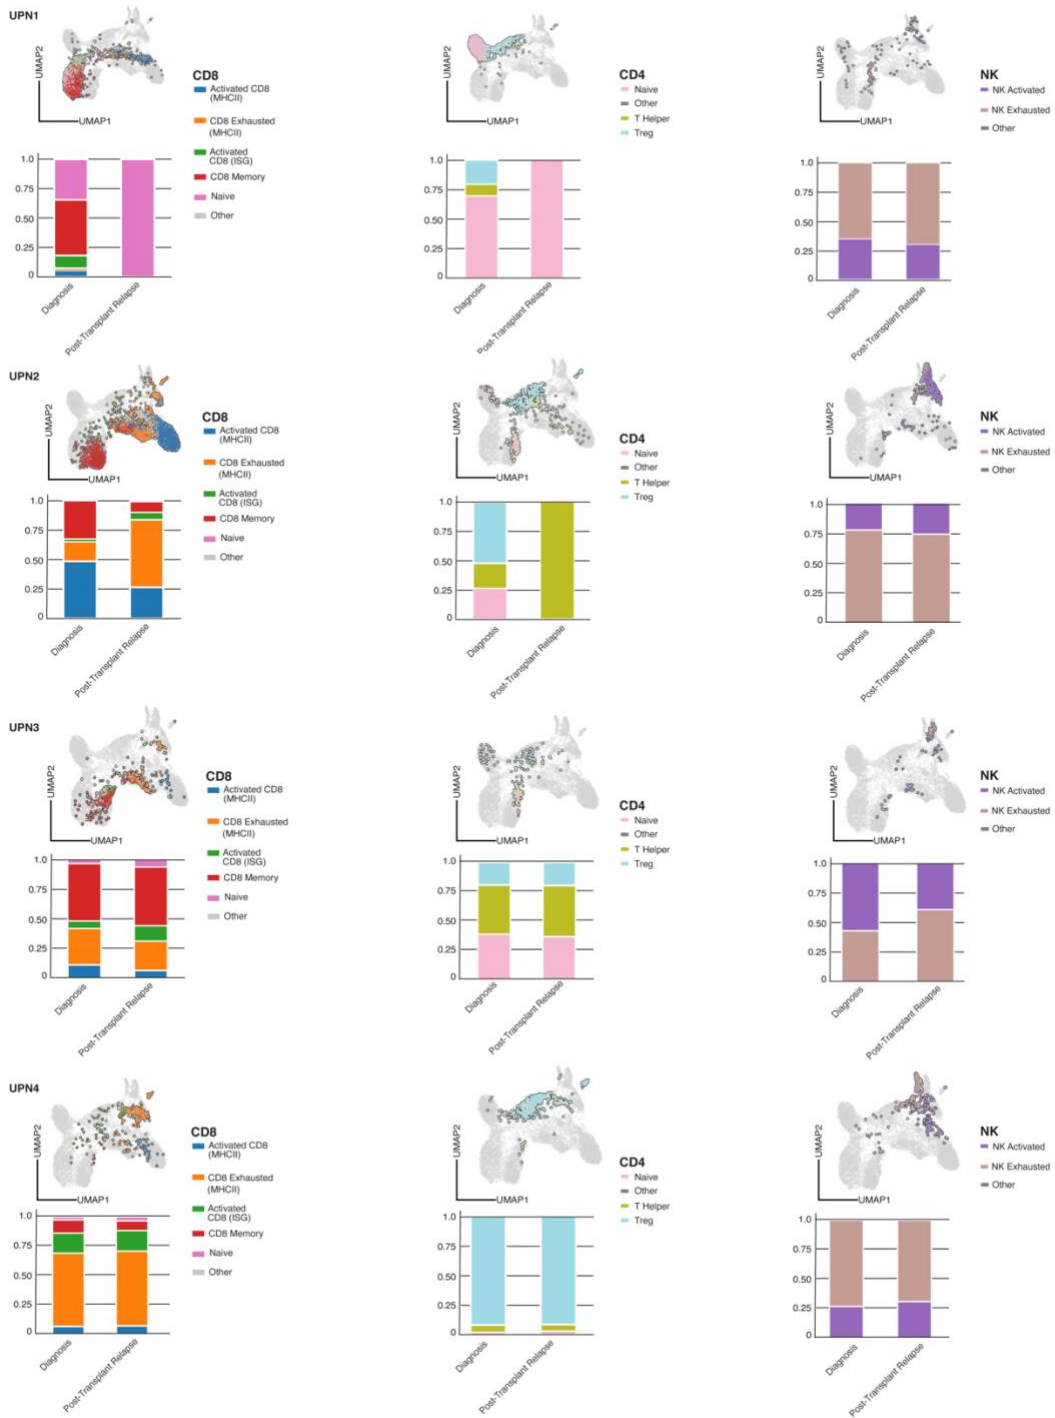

Supplemental Figure 14: Histogram of generation probabilities of public TCR clones.

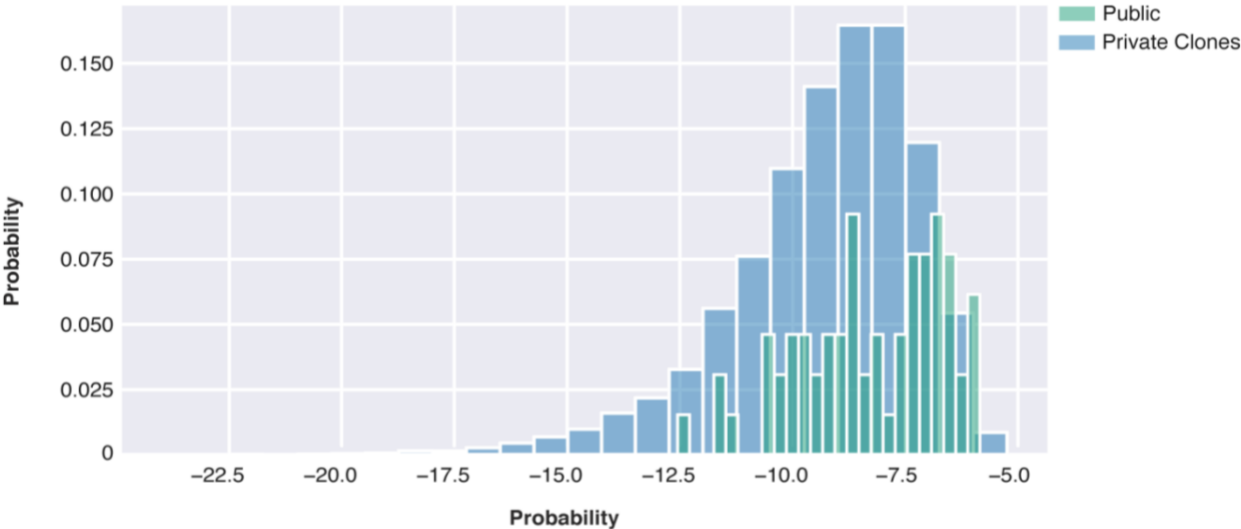

Supplement: BLOODA_ADV-2022-009468-mmc1.pdf [file BLOODA_ADV-2022-009468-mmc1.pdf]
